# Supplementary material for: Narrative synthesis systematic review of Pakistani women’s health outcomes from primary care interventions
Source: HighWire-hosted journal article supplement (doi:10.1136/bmjopen-2022-061644), 2022-08-01
Supplement: bmjopen-2022-061644supp001_data_supplement.pdf [file bmjopen-2022-061644supp001_data_supplement.pdf]

## Supplementary File 1-

### Search Terms and Database Results

#### Search terms

1. primary health OR community health AND Pakistan AND women
2. primary healthcare OR primary health care OR primary service delivery OR primary health service\* OR primary health evaluation OR program\* OR polic\* AND Pakistan AND women
3. primary health OR community health OR wom#n OR mother OR maternal OR women's health OR maternal health OR reproductive health AND Pakistan AND women
4. primary health OR community health OR evidence based practice OR intervention OR RCTs OR randomi\*ed controlled trial\* OR cluster randomi\*ed controlled trial\* OR clinical trial\* OR quasi-experimental OR non-randomi\*ed OR cross-sectional OR mixed methods OR quantitative OR qualitative OR case-study OR group studies OR evidence based OR cohort studies OR case-control studies AND Pakistan AND women
5. primary health OR community health OR (lady health worker OR LHW) OR (community health worker OR CHW) OR (community midwife OR CMW) OR (traditional birth attendant OR TBA) AND Pakistan AND women

**Table:**  
Summary of results from databases searched, as at August ....

| Search Term | PubMed        | BMC           | Medline       | CINAHL        | Cochrane Library | Total          |
|-------------|---------------|---------------|---------------|---------------|------------------|----------------|
| 1.          | 4,074         | 2,435         | 207           | 1,756         | 1,679            | 10,151         |
| 2.          | 1,702         | 1,769         | 8,088         | 2,522         | 2,438            | 16,519         |
| 3.          | 4,427         | 2,435         | 207           | 2,686         | 2,597            | 12,352         |
| 4.          | 5,029         | 2,436         | 23,894        | 7,819         | 7,688            | 46,866         |
| 5.          | 5,458         | 595           | 52            | 0             | 8,340            | 14,445         |
| 6.          | 5,340         | 2,435         | 23,665        | 1,931         | 1,849            | 35,220         |
|             | <b>26,030</b> | <b>12,105</b> | <b>56,113</b> | <b>16,714</b> | <b>24,591</b>    | <b>135,553</b> |
