# Supplementary material for: Narrative synthesis systematic review of Pakistani women’s health outcomes from primary care interventions
Source: HighWire-hosted journal article supplement (doi:10.1136/bmjopen-2022-061644), 2022-08-01
Supplement: bmjopen-2022-061644supp003_data_supplement.pdf [file bmjopen-2022-061644supp003_data_supplement.pdf]

## Supplementary File 3:

## Characteristics of Included Studies

| Table 1:<br>Included intervention-based studies |              |      |                                 |                                                              |                                                                       |                                       |                                                                                                                                                                   |                                                 |                                                                                                                                                                                                   |                                                 |
|-------------------------------------------------|--------------|------|---------------------------------|--------------------------------------------------------------|-----------------------------------------------------------------------|---------------------------------------|-------------------------------------------------------------------------------------------------------------------------------------------------------------------|-------------------------------------------------|---------------------------------------------------------------------------------------------------------------------------------------------------------------------------------------------------|-------------------------------------------------|
| No.                                             | First author | Year | Study Design                    | Setting                                                      | Participants                                                          | Sample size                           | Aim                                                                                                                                                               | Type of Intervention                            | Outcome being measured post intervention                                                                                                                                                          | Intervention Delivered by                       |
| <b>Counseling Interventions</b>                 |              |      |                                 |                                                              |                                                                       |                                       |                                                                                                                                                                   |                                                 |                                                                                                                                                                                                   |                                                 |
| 1                                               | Ali, B. S    | 2003 | RCT                             | Semi-urban community in Karachi city                         | Women aged 18 to 50 years, screened for anxiety and/or depression     | Experiment: n= 70<br>Control: n= 91   | Assess if counseling sessions reduce anxiety and/or depression                                                                                                    | Mental Health Counseling (one on one)           | Reduction in the mean anxiety and depression scores                                                                                                                                               | Briefly trained women counselors of community   |
| 2                                               | Khan, M. N.  | 2017 | Cluster RCT                     | Swat rural district                                          | Women aged 18 or more years affected by conflict                      | Experiment: n= 59<br>Control: n= 60   | Evaluate the feasibility and acceptability of a group psychotherapeutic interventions, based upon cognitive behavioral approach, to reduce anxiety and depression | Mental Health Counseling (in group)             | Decline in psychological distress, measured by levels of anxiety and depression, post-traumatic stress disorder (PTSD), and assessment of general psychological profile and levels of functioning | Briefly trained female non-specialists and LHWs |
| 3                                               | Rahman, A    | 2019 | Cluster RCT                     | Two rural union councils of Swat city (Odigram and Ghalegay) | Women aged 18–60 years affected by conflict                           | Experiment: n= 288<br>Control: n= 290 | Effectiveness of a group psychological intervention to improve mental health                                                                                      | Mental Health Counseling (group session)        | Reductions in symptoms of anxiety, depression, PTSD, and functional impairment, improved social support, and reduced prevalence of depressive disorders 3 months after the intervention           | Briefly trained female non-specialists and LHWs |
| 4                                               | Ali, N. S    | 2010 | Non-randomized quasi-experiment | Qayoomabad and Manzoor Colony of Karachi city                | Mothers (with children 0-30 months) screened for postnatal depression | Experiment: n= 62<br>Control: n= 12   | Assess the benefits of counseling on reducing postnatal depression                                                                                                | Mental Health Counseling (one on one)           | Reduction in the mean anxiety and depression scores                                                                                                                                               | Women from the community                        |
| 5                                               | Sikander, S. | 2019 | Cluster RCT                     | 40 village clusters in Rawalpindi                            | Pregnant women                                                        | Experiment: n= 283<br>Control: n= 287 | Aimed to reduce perinatal depression                                                                                                                              | Mental Health Counseling (one on one and group) | Severity of depressive symptoms and the prevalence of remission 6 months after childbirth                                                                                                         | Volunteer peers and LHWs                        |

|                                                     |              |      |                                             |                                                                                                            |                                                          |                                            |                                                                                                                                                                                              |                                          |                                                                                                                         |                              |
|-----------------------------------------------------|--------------|------|---------------------------------------------|------------------------------------------------------------------------------------------------------------|----------------------------------------------------------|--------------------------------------------|----------------------------------------------------------------------------------------------------------------------------------------------------------------------------------------------|------------------------------------------|-------------------------------------------------------------------------------------------------------------------------|------------------------------|
| 6                                                   | Rahman, A.   | 2008 | RCT                                         | 40 Union Council clusters in rural Rawalpindi city                                                         | Pregnant women                                           | Experiment: n= 463<br>Control: n= 440      | Provide a CBT intervention for mothers with depression                                                                                                                                       | Mental Health Counseling (group session) | Infant weight and height at 6 months and 12 months and prevalence of maternal depression                                | Trained LHWs                 |
| 7                                                   | Hameed, W    | 2016 | Non-inferiority trial without randomisation | Twenty-two (16 rural- and 6 urban-based) franchised reproductive healthcare facilities in district Chakwal | Married women using long-acting reversible contraceptive | Experiment: n= 1,246<br>Control: none      | Compare the effectiveness of active (doorstep and telephonic) and passive (needs-based response) follow-up (counseling) in sustaining the use of long-acting reversible contraceptive (LARC) | Family Planning Counseling (one on one)  | Sustaining the use of long-acting reversible contraceptive                                                              | Female Health Educators      |
| 8                                                   | Sikander, S. | 2015 | RCT                                         | 40 Union Councils in Manshera city                                                                         | Pregnant women                                           | Experiment: n= 210<br>Control: n= 211      | Assess the effectiveness of cognitive-behavioral counseling on the rate and duration of exclusive breastfeeding (EBF) during the first 6 months of an infant's life                          | Family Planning Counseling (one on one)  | Increase in exclusive breastfeeding and decline in use prelacteal feeds                                                 | LHWs                         |
| <b>Health Education and Awareness Interventions</b> |              |      |                                             |                                                                                                            |                                                          |                                            |                                                                                                                                                                                              |                                          |                                                                                                                         |                              |
| 1                                                   | Jokhio, A. H | 2005 | Cluster RCT                                 | 7 subdistricts Larkana city, Sindh province                                                                | Pregnant women                                           | Experiment: n= 10,093<br>Control: n= 9,432 | Provide training and other support to TBAs to reduce perinatal and maternal mortality and reduce complications of pregnancy                                                                  | Health education and awareness           | Decline in perinatal death and maternal mortality                                                                       | TBAS, LHWs and Obstetricians |
| 2                                                   | Omer, K.     | 2008 | Cluster RCT                                 | 10 underdeveloped areas from three cities in Sindh (Karachi West, Karachi South and Hyderabad)             | Pregnant women                                           | Experiment: n= 529<br>Control: n= 541      | Assess the impact of developing community-based communication tools to promote favorable maternal health practices                                                                           | Health education and awareness           | Improvement in prenatal checkups, care during pregnancy, feeding baby colostrum and maintaining exclusive breastfeeding | LHWs                         |
| 3                                                   | Kumar, R.    | 2020 | Non-randomized quasi-experiment             | Two Union Councils (UCs) of Tarparkar district, Sindh                                                      | Pregnant women with children up to 6 months of age       | Experiment: n= 100<br>Control: n= 100      | Effectiveness of a health education intervention for the prevention of malaria in pregnant women with children up to 6 months of age                                                         | Health education and awareness           | Knowledge of malaria prevention & use of long-lasting insecticide treated bed nets                                      | LHWs                         |

|                                              |               |      |                                 |                                                                                                                      |                                   |                                           |                                                                                                                                                            |                                                                        |                                                                                                          |                                                                                                                                           |
|----------------------------------------------|---------------|------|---------------------------------|----------------------------------------------------------------------------------------------------------------------|-----------------------------------|-------------------------------------------|------------------------------------------------------------------------------------------------------------------------------------------------------------|------------------------------------------------------------------------|----------------------------------------------------------------------------------------------------------|-------------------------------------------------------------------------------------------------------------------------------------------|
|                                              |               |      |                                 | Province                                                                                                             |                                   |                                           |                                                                                                                                                            |                                                                        |                                                                                                          |                                                                                                                                           |
| <b>Social and Psychosocial Interventions</b> |               |      |                                 |                                                                                                                      |                                   |                                           |                                                                                                                                                            |                                                                        |                                                                                                          |                                                                                                                                           |
| 1                                            | Hirani, S. S. | 2018 | RCT                             | Low socioeconomic areas of Karachi city                                                                              | Young adult women, 20–45 years    | Experiment: n= 60<br>Control: n= 60       | Provide a social support intervention to enhance resilience and quality of life                                                                            | Social, psychosocial or preventive <i>Social- group sessions</i>       | Improvement in resilience and quality of life                                                            | CHWs                                                                                                                                      |
| 2                                            | Maselko, J    | 2020 | RCT                             | 40 village clusters in Kallar Syedan, a rural subdistrict of Rawalpindi city                                         | Pregnant women                    | Experiment: n= 206<br>Control: n= 683     | Assess the effectiveness of psychosocial intervention on maternal depression and child development (group session)                                         | Social, psychosocial or preventive <i>Psychosocial- group sessions</i> | Decline in maternal depression symptoms and remission                                                    | Non-specialists peers (lay married women who lived in the same community as that of the women with depression and volunteered their time) |
| <b>Combination Interventions</b>             |               |      |                                 |                                                                                                                      |                                   |                                           |                                                                                                                                                            |                                                                        |                                                                                                          |                                                                                                                                           |
| 1                                            | Azmat, S. K.  | 2013 | Non-randomized quasi-experiment | Rural and under-served communities of (i) Badin and Dadu-Sindh province, and (ii) Jhang and Khanewal-Punjab province | Married women reproductive age    | Experiment: n= 2,483<br>Control: n= 2,509 | Evaluate the effectiveness of a social franchise programme along with a free voucher scheme to promote awareness and use of modern long term contraceptive | Combination                                                            | Assess improvement in contraceptive awareness and long-term contraception use                            | Female health visitors, midwives and nurses at their respective private clinics                                                           |
| 2                                            | Azmat, S. K.  | 2016 | Non-randomized quasi-experiment | Eight districts of Sindh, Punjab and KPK                                                                             | Married women reproductive age    | Experiment: n= 1,817<br>Control: n= 1,075 | Provide accessible and affordable long term family planning services through marketing, branding and introducing a voucher scheme                          | Combination                                                            | Increasing awareness about FP methods and use of contraception                                           | Trained facilitators and CMWs                                                                                                             |
| 3                                            | Ali, M        | 2020 | Non-randomized quasi-experiment | Faisalabad (urban) & Toba Tek Singh (rural),                                                                         | Married women of reproductive age | Experiment: n= 1,276<br>Control: n= 1,276 | Assess the effectiveness of a subsidized, multipurpose voucher intervention to enhance the client-provider interaction for improved                        | Combination                                                            | Increase in modern contraception use, knowledge of contraceptives, receiving ANC, and delivery at health | Vouchers and awareness outreach through service providers and distributing                                                                |

|   |               |      |     |                                                                          |                                          |                                             |                                                                                                                                                                                                                                                     |             |                                                                                                                           |                                                              |
|---|---------------|------|-----|--------------------------------------------------------------------------|------------------------------------------|---------------------------------------------|-----------------------------------------------------------------------------------------------------------------------------------------------------------------------------------------------------------------------------------------------------|-------------|---------------------------------------------------------------------------------------------------------------------------|--------------------------------------------------------------|
|   |               |      |     | Punjab                                                                   |                                          |                                             | contraceptive counseling, modern contraception methods uptake, continued use, and its impact on equity through better targeting, while increasing uptake of postnatal care and child immunization among women from the lowest two wealth quintiles. |             | facilities (also child vaccination rates for BCG, DPT, HBV, and measles)                                                  | agencies                                                     |
| 4 | Midhet, F     | 2010 | RCT | 32 village clusters in Khuzdar, a rural district of Baluchistan province | Pregnant women                           | Experiment: n= 1,539<br>Control: n= 1,022   | Assess the impact of education sessions for safe motherhood practices, TBA training, and emergency transport system on maternal and neonatal health indicators                                                                                      | Combination | Reduction of delays in seeking medical care for obstetric complications and reduction in perinatal and neonatal mortality | Local women with secondary school education or above, & TBAs |
| 5 | Qureshi, R. N | 2020 | RCT | Matiari and Hyderabad districts, Sindh Province                          | Pregnant women screened for preeclampsia | Experiment: n= 20,264<br>Control: n= 19,182 | Assess the impact of combined interventions for pre-eclampsia (Mobile health assessment; referral; doorstep visits; and educational sessions) to reduce all-cause maternal and perinatal mortality and major morbidity                              | Combination | Reduction in stillbirths, maternal death or morbidity, early or late neonatal deaths and neonatal morbidity               | LHWs                                                         |
